# Supplementary material
Source: publisher figshare collection journal article supplement (https://sage.figshare.com/ndownloader/files/17448209)
Supplement: Supplementary file 1 [file 17448209]

## Appendix: The applications of Lefebvrian conceptualizations in the Turkish context

| I <sup>1</sup>     | II <sup>2</sup> | III <sup>3</sup>                                                                             | IV <sup>4</sup>                              | V <sup>5</sup>       | VI <sup>6</sup>                                                                    | VII <sup>7</sup>                  |
|--------------------|-----------------|----------------------------------------------------------------------------------------------|----------------------------------------------|----------------------|------------------------------------------------------------------------------------|-----------------------------------|
| (Açar, 2013)       | DT              | the reproduction of space and the nature of spatial transformations in Istanbul              | abstract space; spatial triad                | the post-1980 period | Istanbul                                                                           | skyscrapers                       |
| (Ağlargoğlu, 2016) | P               | a socio-spatial analysis of a university campus                                              | spatial triad                                | X                    | X                                                                                  | a university campus               |
| (Akaslan, 2006)    | MT              | urban spaces that lost their effectiveness                                                   | spatial triad                                | X                    | Istanbul                                                                           | 1st May demonstrations            |
| (Akgün, 2001)      | DT              | the relations of spatial image and spatial practice of the immigrants from Bulgaria in Bursa | spatial practice; spatial image; lived space | X                    | Bursa                                                                              | the Bulgarian immigrants in Bursa |
| (Aksoy, 2015)      | MT              | subway stations in the relationships of urban rhythm and public space                        | spatial triad                                | X                    | Istanbul M2 subway line (Levent, Gayrettepe and Şişli-Mecidiyeköy subway stations) | subway stations                   |
| (Altay, 2004)      | MT              | the redefinition of urban space through everyday activities of the youth                     | spatial triad                                | X                    | Kavaklıdere, Tunalı (Ankara)                                                       | 'Minibar'                         |

<sup>1</sup> publication/study

<sup>2</sup> publication type (DT-Doctoral Thesis, MT-Master's Thesis, P-paper, B-Book, BC-Book Chapter)

<sup>3</sup> the topic of the study

<sup>4</sup> conceptual framework or concept contextualised in the study

<sup>5</sup> the time-frame of the study (if any)

<sup>6</sup> the spatial unit or spatial scale of the study (if any)

<sup>7</sup> event, case or process analysed

| I <sup>1</sup>   | II <sup>2</sup> | III <sup>3</sup>                                                                                     | IV <sup>4</sup>                                                       | V <sup>5</sup>              | VI <sup>6</sup>                                                                                                               | VII <sup>7</sup>                                                                                                                                                                                                                 |
|------------------|-----------------|------------------------------------------------------------------------------------------------------|-----------------------------------------------------------------------|-----------------------------|-------------------------------------------------------------------------------------------------------------------------------|----------------------------------------------------------------------------------------------------------------------------------------------------------------------------------------------------------------------------------|
| (Aslan, 2012)    | MT              | the dynamics conditioning the transformation of public space                                         | representation of space;<br>representational space;<br>abstract space | X                           | Central Garage and City Square Shopping Centre (Bursa)                                                                        | X                                                                                                                                                                                                                                |
| (Aslan, 2014)    | P               | everyday life, alienation, and gender                                                                | spatial triad                                                         | X                           | X                                                                                                                             | <i>Aaahh Belinda</i> movie                                                                                                                                                                                                       |
| (Aslankan, 2014) | DT              | the mixed-use high-rise residential complexes in Istanbul                                            | representation of space;<br>representational space                    | X                           | Istanbul                                                                                                                      | X                                                                                                                                                                                                                                |
| (Atabey, 2010)   | BC              | the representation of Istanbul in recent Turkish cinema                                              | abstract space;<br>lived space                                        | the late 1990s, early 2000s | X                                                                                                                             | <i>Eşkiya</i> (The Bandit), <i>Tabutta Rövaşata</i> (Somersault in a Coffin), <i>Ağır Roman</i> (Slow Roman), <i>Filler ve Çimen</i> (Elephants and Grass), <i>Uzak</i> (Distant), <i>Anlat İstanbul</i> (Istanbul Tales) movies |
| (Ateş, 2015)     | MT              | practices of guerilla gardening through appropriation and reclamation of public space by inhabitants | spatial triad                                                         | X                           | 100. Yıl Berkin Elvan Garden (100. Yıl, Ankara); Şenay and Gülsüman People's Garden (Küçük Armutlu, Istanbul); Yalınca Garden | guerrilla gardening                                                                                                                                                                                                              |

| I <sup>1</sup>  | II <sup>2</sup> | III <sup>3</sup>                                                                                                       | IV <sup>4</sup>                                         | V <sup>5</sup> | VI <sup>6</sup>                                   | VII <sup>7</sup>                        |
|-----------------|-----------------|------------------------------------------------------------------------------------------------------------------------|---------------------------------------------------------|----------------|---------------------------------------------------|-----------------------------------------|
|                 |                 |                                                                                                                        |                                                         |                | (METU Campus,<br>Ankara)                          |                                         |
| (Atıcı, 2014)   | MT              | the construction of the<br>public realm in<br>contemporary art                                                         | spatial practices;<br>representational<br>space         | X              | X                                                 | the International<br>Istanbul Biennials |
| (M. Baş, 2008)  | MT              | the production of<br>social space through<br>the ownership and<br>possession of space<br>and boundaries of<br>dwelling | abstract space;<br>differential space;<br>spatial triad | X              | Sulukule<br>(Istanbul)                            | X                                       |
| (Y. Baş, 2010)  | P               | urban planning and<br>imaginary community                                                                              | representation of<br>space                              | X              | Ankara                                            | "Ankara" novel                          |
| (Y. Baş, 2015)  | DT              | the production of<br>urban form and<br>reproduction of<br>property relations                                           | abstract space;<br><i>work and product</i>              | 1933-1965      | Yenişehir<br>(Ankara)                             | X                                       |
| (Basa, 2015a)   | P               | the production of<br>space in Ankara in the<br>Early Republican<br>period                                              | spatial triad                                           | 1920-30s       | Ankara                                            | x                                       |
| (Basa, 2015b)   | P               | the role of urban<br>sculptures in the<br>sustainability of urban<br>memory                                            | spatial triad                                           | X              | İskitler urban<br>transformation<br>area (Ankara) | an architectural<br>studio experience   |
| (Basa, 2016)    | P               | the production of<br>space and<br>spatialization of<br>collective memory in<br>Samsun                                  | spatial triad                                           | X              | Samsun                                            | X                                       |
| (Batuman, 2003) | P               | the transformation of<br>public space through<br>student riots                                                         | representational<br>space                               | 1960-70s       | Kızılay Square<br>(Ankara)                        | X                                       |

| I <sup>1</sup>        | II <sup>2</sup> | III <sup>3</sup>                                                                         | IV <sup>4</sup>                                                                     | V <sup>5</sup> | VI <sup>6</sup>                           | VII <sup>7</sup>           |
|-----------------------|-----------------|------------------------------------------------------------------------------------------|-------------------------------------------------------------------------------------|----------------|-------------------------------------------|----------------------------|
| (Batuman, 2005)       | P               | the production of identity and monumentality in the Early Republican period              | representational space                                                              | 1920-30s       | Kızılay Square (Ankara)                   | Security Monument (Ankara) |
| (Batuman, 2006)       | DT              | the role of architectures and planners in the production of spaces of counter hegemony   | spatial triad                                                                       | 1960-1980      | Turkey (general)                          | X                          |
| (Batuman, 2008)       | P               | the role of architectures and planner in the production of urban representations         | representation of space                                                             | 1960-70s       | X                                         | X                          |
| (Batuman, 2014)       | P               | the relationships between space and representation through language                      | representation of space;<br>representational space                                  | X              | Gezi Park;<br>Taksim Square               | Gezi Park protests         |
| (Batuman, 2015a)      | P               | the politics of public space in Taksim Square                                            | encounter;<br>rhythmanalysis;<br>spatial practices;<br>domination and appropriation | X              | Taksim Square,<br>Gezi Park               | Gezi Park protests         |
| (Batuman, 2015b)      | P               | visual representations of the built environment in the Early Republican Ankara postcards | representation of space                                                             | 1920-1930s     | Ankara                                    | Ankara postcards           |
| (Baydar et al., 2016) | P               | the relationships between space, design and everyday life in the mass housing            | spatial triad                                                                       | X              | Örnekköy and Uzundere settlements (Izmir) | X                          |

| I <sup>1</sup>     | II <sup>2</sup> | III <sup>3</sup>                                                                                                          | IV <sup>4</sup>                                                        | V <sup>5</sup>   | VI <sup>6</sup>                 | VII <sup>7</sup>             |
|--------------------|-----------------|---------------------------------------------------------------------------------------------------------------------------|------------------------------------------------------------------------|------------------|---------------------------------|------------------------------|
|                    |                 | settlements produced within the framework of urban renewal projects                                                       |                                                                        |                  |                                 |                              |
| (Berber, 2010)     | DT              | the transformation dynamics of contemporary metropolises                                                                  | representational space (as lived space); abstract space                | post-1980 period | Istanbul                        | X                            |
| (Bernardoni, 2013) | BC              | graffiti and the social production of space in Istanbul                                                                   | spatial triad                                                          | X                | Istanbul                        | X                            |
| (Casier, 2011)     | P               | the appropriation and re-imagination of the Mesopotamia region by Kurdish movement for political and ideological purposes | spatial triad                                                          | X                | X                               | the Mesopotamia Social Forum |
| (Castagno, 2015)   | MT              | the production of space, transgressive urban design and control of public space                                           | ownership and possession (of space)                                    | X                | X                               | Gezi Park protests           |
| (Çelik, 2008)      | MT              | the process and patterns of urban social exclusion                                                                        | abstract space; contradictory space; differential space; spatial triad | post-1950 period | Istanbul                        | X                            |
| (Cengizkan, 2010)  | P               | the design and construction process of the Ministries Quarter a mise en scene for a nation                                | representation of space                                                | 1920-1940        | the Ministries Quarter (Ankara) | X                            |

| I <sup>1</sup>  | II <sup>2</sup> | III <sup>3</sup>                                                                                                        | IV <sup>4</sup>                                                   | V <sup>5</sup>                     | VI <sup>6</sup>                                                                         | VII <sup>7</sup>                                                           |
|-----------------|-----------------|-------------------------------------------------------------------------------------------------------------------------|-------------------------------------------------------------------|------------------------------------|-----------------------------------------------------------------------------------------|----------------------------------------------------------------------------|
| (Ceylan, 2015)  | MT              | the impact of post-disaster spatial structure on low-income women                                                       | spatial triad                                                     | X                                  | Kiremitocağı, Çay, Fevzi Çakmak, and Beyciler neighborhoods, Gümüşpınar village (Düzce) | X                                                                          |
| (Cil, 2005)     | DT              | the social, physical and spatial construction of the identities of a place                                              | spatial triad                                                     | since the 2nd half of 19th Century | Kula (Manisa)                                                                           | X                                                                          |
| (Çınar, 2014)   | P               | the impacts of the modernization of the Turkish Republic on urban planning                                              | abstract space                                                    | the 1920s                          | Ankara                                                                                  | Lörcher's Plan                                                             |
| (Çolak, 2014)   | MT              | passages as spaces of memory                                                                                            | spatial triad                                                     | X                                  | Kızılay (Ankara)                                                                        | passages                                                                   |
| (Çolpa, 2015)   | MT              | the conviviality of urban space with respect to people's socio-spatial experiences in streets                           | spatial triad                                                     | X                                  | Sakarya Street (Ankara)                                                                 | X                                                                          |
| (Cörüt, 2015)   | BC              | the compulsory public service of doctors in the context of the assimilation strategy of JDP and the production of space | abstract space; spatial triad; counter-space                      | X                                  | Hakkari                                                                                 | X                                                                          |
| (Demirel, 2005) | MT              | the production of residential space in Duzce after the 1999 Marmara Earthquake                                          | absolute space, abstract space, differential space; spatial triad | X                                  | Düzce                                                                                   | İmece Evleri Projesi (Solidarity Houses Project), Gölyaka Kalıcı Konutları |

| I <sup>1</sup>                    | II <sup>2</sup> | III <sup>3</sup>                                                                     | IV <sup>4</sup>                                   | V <sup>5</sup>   | VI <sup>6</sup>                                               | VII <sup>7</sup>                                                                                  |
|-----------------------------------|-----------------|--------------------------------------------------------------------------------------|---------------------------------------------------|------------------|---------------------------------------------------------------|---------------------------------------------------------------------------------------------------|
|                                   |                 |                                                                                      |                                                   |                  |                                                               | (Gölyaka Permanent Houses), Düzce Depremzedeler Derneği (Düzce Association of Earthquake Victims) |
| (Demirkol, 2015)                  | DT              | the transformation of everyday life in ‘ <i>Gırgır</i> ’ humor magazine              | spatial triad                                     | X                | X                                                             | “Gırgır” humor magazine                                                                           |
| (F. A. Demirtaş, 2000)            | MT              | water infrastructure and its experience as an urban and natural space                | representational space                            | 1930'lar         | Marmara and Karadeniz Pools (the Atatürk Forest Farm, Ankara) | X                                                                                                 |
| (N. Demirtaş, 2007)               | DT              | an alternative local historical reading of the formation of squatter space in Turkey | abstract space; spatial triad                     | post-1950 period | Boğaziçi Neighborhood, Mamak (Ankara)                         | X                                                                                                 |
| (Demirtaş-Milz & Saraçoğlu, 2015) | BC              | space, capitalism and Kurdish immigrants in İzmir                                    | abstract space; spatial triad                     | X                | Kadifekale squatter settlements (İzmir)                       | Kadifekale Urban Transformation Project                                                           |
| (Doğan, 2005)                     | DT              | Islamist municipalism and the production of space                                    | abstract space; contradictory space spatial triad | 1994-2004        | Kayseri                                                       | X                                                                                                 |
| (Doğan & Yılmaz, 2011)            | P               | identity, social tension and the production of space in                              | spatial triad                                     | 1998-2009        | Demirtaş Neighborhood, Akdeniz and                            | X                                                                                                 |

| I <sup>1</sup>          | II <sup>2</sup> | III <sup>3</sup>                                                                                                                                     | IV <sup>4</sup>                            | V <sup>5</sup>   | VI <sup>6</sup>                                              | VII <sup>7</sup>                                                            |
|-------------------------|-----------------|------------------------------------------------------------------------------------------------------------------------------------------------------|--------------------------------------------|------------------|--------------------------------------------------------------|-----------------------------------------------------------------------------|
|                         |                 | forced migration neighborhoods                                                                                                                       |                                            |                  | Toroslar Districts (Mersin)                                  |                                                                             |
| (El-Kazaz, 2014)        | DT              | urban governance practices and urban transformation in Cairo and Istanbul in the context of neo-liberalization and globalization                     | spatial triad                              | post-2000 period | Fener-Balat; Sulukule; Tarlabası (Istanbul)                  | Fener-Balat, Sulukule, and Tarlabası Urban Transformation Projects          |
| (Eranlı et al., 2015)   | P               | the change of socio-spatial experiences in the process of urban transformation and relocation of inhabitants                                         | spatial triad                              | X                | Kadifekale and Uzundere (Izmir)                              | Kadifekale Urban Transformation Project, TOKİ Uzundere                      |
| (Ercan, 2011)           | MT              | the ambivalence of urban space and contradictory forms of space in Turkish cinema                                                                    | abstract space; spatial triad              | X                | X                                                            | <i>A Ay (Oh Moon)</i> and <i>Karanlık Sular (The Serpent's Tale)</i> movies |
| (Erdi-Lelandais, 2013)  | P               | citizenship, minorities and the struggle for a right to the city in Istanbul                                                                         | representation of space; spatial practices | X                | 1 Mayıs Neighborhood (Ümraniye); Sulukule (Fatih) - Istanbul | X                                                                           |
| (Erdi-Lelandais, 2014a) | BC              | practices of everyday resistance against urban transformation project in a Romani neighborhood in Istanbul within the context of a right to the city | representation of space; spatial practices | X                | Sulukule (Istanbul)                                          | X                                                                           |



| I <sup>1</sup>              | II <sup>2</sup> | III <sup>3</sup>                                                                                              | IV <sup>4</sup>                                                           | V <sup>5</sup>   | VI <sup>6</sup>                                                 | VII <sup>7</sup>                                                                       |
|-----------------------------|-----------------|---------------------------------------------------------------------------------------------------------------|---------------------------------------------------------------------------|------------------|-----------------------------------------------------------------|----------------------------------------------------------------------------------------|
| (Erdi-Lelandais, 2014b)     | P               | space and identity in the struggle against neo-liberal urban planning                                         | representation of space;<br>spatial practices                             | X                | 1 Mayıs Mahallesi (Ümraniye);<br>Sulukule (Fatih)<br>- Istanbul | X                                                                                      |
| (Ergin, 2006)               | MT              | social resistance in Istanbul against urban renewal                                                           | counter-space;<br>abstract space;<br>differential space;<br>spatial triad | X                | Güzeltepe Neighborhood (Eyüp, Istanbul)                         | Güzeltepe squatter resistance                                                          |
| (Ergin, 2014)               | DT              | urban social movements, ways of resistance, their patterns and dynamics against urban transformation projects | abstract space;<br>representation of space;<br>representational space;    | post-2010 period | Istanbul                                                        | urban social movements                                                                 |
| (Erkılıç & Bayraktar, 2015) | P               | A Lefebvrian analysis of "Ekümenopolis" documentary                                                           | spatial triad                                                             | X                | X                                                               | <i>Ekümenopolis: Ucu Olmayan Şehir</i> (Ecumenopolis: City Without Limits) documentary |
| (E. Erol, 2014)             | P               | counter-hegemonic socio-spatial movements in Turkey                                                           | autogestion, differential space                                           | X                | X                                                               | Gezi Park protests, TEKEL resistance                                                   |
| (D. Erol, 2015)             | MT              | the transformations of public space through dissident practices and actions of urbanites                      | spatial triad;<br>abstract space                                          | X                | Gezi Park                                                       | Gezi Park protests                                                                     |

| I <sup>1</sup>                | II <sup>2</sup> | III <sup>3</sup>                                                                                                           | IV <sup>4</sup>                                         | V <sup>5</sup>   | VI <sup>6</sup>                            | VII <sup>7</sup>                                       |
|-------------------------------|-----------------|----------------------------------------------------------------------------------------------------------------------------|---------------------------------------------------------|------------------|--------------------------------------------|--------------------------------------------------------|
| (Eryılmaz, 2016)              | P               | a spatial analysis of Gezi Movement through Lefebvre, Harvey and Bookchin's theorizations                                  | abstract space; differential space; spatial triad       | X                | Gezi Park and Taksim Square                | Gezi Movement                                          |
| (Fırat, 2011)                 | P               | urban commons and urban social movements                                                                                   | abstract space; spatial triad                           | X                | X                                          | the struggle around Emek Movie Theater                 |
| (Gegelioğlu & Aydın, 2014)    | M               | the role and impact of architecture and architectural design in the processes of production of space in a consumer society | abstract space; spatial triad; the consumption of space | X                | X                                          | Tekfen Kağıthane OfisPark project (Kağıthane-İstanbul) |
| (Genç, 2014)                  | DT              | hegemonic neo-liberal urbanism and the production of space in Diyarbakır                                                   | abstract space; spatial triad                           | 1999-2014        | Diyarbakır                                 | X                                                      |
| (Gulhan, 2014)                | DT              | State and the historical process of the production of the built environment in Istanbul                                    | representation of space; the state mode of production   | post-1950 period | Istanbul                                   | X                                                      |
| (Gülkök, 2013)                | MT              | the production, re-production and de-construction dynamics of sidewalks                                                    | abstract space; spatial triad; the consumption of space | 1923-2013        | Atatürk Boulevard (Ankara)                 | sidewalks                                              |
| (Akgün Gültekin & Ünlü, 2015) | P               | analysis of the environmental effects of gated communities on the neighborhood                                             | spatial triad                                           | X                | Altunizade Mesa, Tarabya İntes, Bahçeşehir | X                                                      |

| I <sup>1</sup>    | II <sup>2</sup> | III <sup>3</sup>                                                                                         | IV <sup>4</sup>                                                                    | V <sup>5</sup>    | VI <sup>6</sup>              | VII <sup>7</sup>       |
|-------------------|-----------------|----------------------------------------------------------------------------------------------------------|------------------------------------------------------------------------------------|-------------------|------------------------------|------------------------|
|                   |                 | in the context of environmental stress                                                                   |                                                                                    |                   | Ardıçlı Gölevleri (Istanbul) |                        |
| (Gündoğan, 2011)  | P               | the production of nation-state space in Turkey in the 1960s and the role of Kurdish contentious politics | abstract space; representation of space; representational space; spatial practices | the 1960s         | South-Eastern Turkey         | Eastern Meetings, 1967 |
| (B. F. Gür, 2002) | P               | the transformation of urban space through discursive representational practices                          | spatial triad                                                                      | X                 | Sultanahmet (Istanbul)       | X                      |
| (F. Gür, 2006)    | DT              | Atatürk monuments in the Early Republican period                                                         | dominated space                                                                    | 1923-1938         | X                            | Atatürk monuments      |
| (Gurel, 2007)     | DT              | social, cultural, political, economic, and architectural aspects of urban apartments                     | representational space                                                             | 1950-1965         | X                            | urban apartments       |
| (Hornstein, 2015) | MT              | the role of space in political contention (space, place and policing in Gezi Park protests)              | spatial triad                                                                      | X                 | Gezi Park                    | Gezi Park protests     |
| (İlkay, 2007)     | MT              | the transformation of political struggle on and at public space                                          | spatial triad                                                                      | from 1923 onwards | Kızılay Square (Ankara)      | X                      |
| (Işıklılar, 2016) | MT              | a heterotopic analysis of Taksim Gezi Park protests                                                      | spatial triad                                                                      | X                 | Taksim Square, Gezi Park     | Gezi Park protests     |

| I <sup>1</sup>    | II <sup>2</sup> | III <sup>3</sup>                                                                                                                                                       | IV <sup>4</sup>                                                                          | V <sup>5</sup>      | VI <sup>6</sup>                                                     | VII <sup>7</sup>                                                      |
|-------------------|-----------------|------------------------------------------------------------------------------------------------------------------------------------------------------------------------|------------------------------------------------------------------------------------------|---------------------|---------------------------------------------------------------------|-----------------------------------------------------------------------|
| (Jongerden, 2007) | B               | settlement and<br>resettlement policies<br>and the production of<br>space in South-East<br>Turkey in the context<br>of the Kurdish<br>question and the war<br>with PKK | spatial triad                                                                            | the 1990s           | Beruk, İslamköy,<br>Matrani and<br>Mira settlements<br>(Diyarbakir) | X                                                                     |
| (Jongerden, 2009) | P               | the organization of<br>state and society in<br>Turkish Kurdistan                                                                                                       | representation of<br>space                                                               | X                   | South East<br>Region (Turkish<br>Kurdistan)                         | Village Return and<br>Rehabilitation<br>Development Plan<br>(GAP-BKİ) |
| (Kahya, 2015)     | DT              | spatiotemporal<br>structuration urban<br>experience through art<br>and cultural events                                                                                 | spatial triad                                                                            | X                   | Beyoğlu<br>(Istanbul)                                               | 141 art and<br>cultural events                                        |
| (Karakaya, 2010)  | MT              | the relation between<br>urban planning<br>experiences and<br>political ideology in<br>Early Republican<br>Turkey                                                       | spatial hegemony                                                                         | 1923-1940           | X                                                                   | X                                                                     |
| (Karasulu, 2014)  | P               | Gezi resistance and<br>the importance of<br>space with respect to<br>the changing socio-<br>spatial order of the<br>cities                                             | spatial triad                                                                            | X                   | Gezi Park,<br>Taksim Square                                         | Gezi Park protests                                                    |
| (Kayalığil, 2015) | DT              | memory,<br>musealization, and<br>heterotopia in Sivas                                                                                                                  | appropriated<br>space; dominated<br>space; diversion<br>(detournement);<br>spatial triad | post-1990<br>period | Sivas                                                               | X                                                                     |

| I <sup>1</sup>            | II <sup>2</sup> | III <sup>3</sup>                                                                                      | IV <sup>4</sup>                                    | V <sup>5</sup> | VI <sup>6</sup>                                               | VII <sup>7</sup>                        |
|---------------------------|-----------------|-------------------------------------------------------------------------------------------------------|----------------------------------------------------|----------------|---------------------------------------------------------------|-----------------------------------------|
| (Kaypak, 2014a)           | P               | the views of Mustafa Kemal on city and urbanization                                                   | representation of space;<br>representational space | 1923-1938      | Ankara                                                        | X                                       |
| (Kaypak, 2014b)           | P               | the approach of the Turkish Enlightenment to city and urbanization                                    | representation of space;<br>representational space | 1923-1938      | Ankara                                                        | X                                       |
| (Kennedy, 2005)           | DT              | architects' professional practice in the context of the sociology of the architecture profession      | spatial triad                                      | X              | X                                                             | architects                              |
| (Khakee & Grassini, 2015) | P               | understanding multiple aspects of present urban space with the help of future scenarios               | spatial triad                                      | X              | Izmir                                                         | X                                       |
| (Kılıç-Çalgıcı, 2013)     | P               | public space as a stage for theatrical activities                                                     | spatial triad                                      | X              | Alsancak-Kıbrıs Şehitleri Street (Izmir)                      | theatrical activities of street artists |
| (Koçak, 2008)             | DT              | the production of urban space in Ankara with respect to social relations of planning and architecture | abstract space;<br>spatial triad                   | 1923-2007      | Ankara (Atatürk Boulevard, Sıhhiye, Ulus and Kızılay squares) | X                                       |
| (Kor, 2013)               | MT              | cemeteries in the context of religious beliefs, cultural rituals, and funerary customs                | representational space                             | X              | Ankara Cebeci Cemetery (Cebeci, Ankara)                       | cemeteries                              |

| I <sup>1</sup>  | II <sup>2</sup> | III <sup>3</sup>                                                                                                         | IV <sup>4</sup>                                                   | V <sup>5</sup> | VI <sup>6</sup>             | VII <sup>7</sup>                                                   |
|-----------------|-----------------|--------------------------------------------------------------------------------------------------------------------------|-------------------------------------------------------------------|----------------|-----------------------------|--------------------------------------------------------------------|
| (Koyuncu, 2015) | MT              | conceptual re-reading of the urban transformation process and political counter-practices of social movements            | abstract space; spatial triad                                     | X              | Gezi Park; Takism Square    | Taksim Gezi Park protests                                          |
| (Kulözü, 2008)  | MT              | the transformation of public space in terms of its meaning, form, and function                                           | spatial triad                                                     | 1839-2006      | Hacıbayram Square (Ankara)  | X                                                                  |
| (Kural, 2009)   | DT              | parameters of sustainability in urban residential areas                                                                  | absolute space; abstract space; differential space; spatial triad | X              | Temelli (Ankara)            | X                                                                  |
| (Kutlar, 2005)  | P               | the portrayal of space in Classical Turkish Literature                                                                   | representational space                                            | X              | Sa'dabad (Kağıthane)        | X                                                                  |
| (Mert, 2013)    | DT              | music in Istanbul in the context of the poststructuralist theory of space                                                | representational space                                            | X              | X                           | X                                                                  |
| (Mirze, 2005)   | DT              | the relationships of diasporic subjectivity, geographical consciousness and identity politics in postcolonial literature | spatial triad                                                     | X              | X                           | Orhan Pamuk's <i>White Castle</i> and <i>My Name is Red</i> novels |
| (Narkar, 2006)  | MT              | informal urban spaces in the context of the use of urban space                                                           | spatial triad                                                     | X              | Istanbul (6 cases examined) | X                                                                  |
| (Önder, 2012)   | MT              | the socio-economic and socio-cultural contradictions of the                                                              | spatial triad                                                     | 2005-2012      | Tarlabaşı (Istanbul)        | Tarlabaşı Urban Renewal Project                                    |

| I <sup>1</sup>       | II <sup>2</sup> | III <sup>3</sup>                                                                                                                                           | IV <sup>4</sup> | V <sup>5</sup>   | VI <sup>6</sup>                      | VII <sup>7</sup>            |
|----------------------|-----------------|------------------------------------------------------------------------------------------------------------------------------------------------------------|-----------------|------------------|--------------------------------------|-----------------------------|
|                      |                 | urban regime in Turkey                                                                                                                                     |                 |                  |                                      |                             |
| (Özaksoy, 2005)      | MT              | the relationships between urbanization, urban space and social thought in Turkey                                                                           | spatial triad   | X                | X                                    | urbanists and city planners |
| (Özalöğlu, 2006)     | DT              | the transformation of urban culture, everyday life and spatial practices in the Early Republican period                                                    | spatial triad   | 1935-1950        | Ankara                               | X                           |
| (Özalöğlu, 2008)     | BC              | the transformation of urban culture, everyday life and spatial practices in the Early Republican period                                                    | spatial triad   | 1935-1950        | Ankara                               | X                           |
| (Özgün, 2012)        | MT              | relationships between the sound structures in the street that people produce during the political action and the social context of these political actions | spatial triad   | X                | Istanbul                             | X                           |
| (Özkan, 2008)        | DT              | spatial practices in Istanbul and the production of space                                                                                                  | x               | the 2000s        | Istanbul (Oda Projesi)               | Oda Projesi                 |
| (D. C. Öztürk, 2013) | MT              | the socio-spatial practices of pro-Kurdish                                                                                                                 | spatial triad   | post-1999 period | Diyarbakir Metropolitan Municipality | X                           |

| I <sup>1</sup>    | II <sup>2</sup> | III <sup>3</sup>                                                                                                                                           | IV <sup>4</sup>                                 | V <sup>5</sup>      | VI <sup>6</sup>                                                            | VII <sup>7</sup>                                        |
|-------------------|-----------------|------------------------------------------------------------------------------------------------------------------------------------------------------------|-------------------------------------------------|---------------------|----------------------------------------------------------------------------|---------------------------------------------------------|
|                   |                 |                                                                                                                                                            |                                                 |                     | (Sur, Yenişehir,<br>Bağlar and<br>Kayapınar<br>District<br>Municipalities) |                                                         |
| (M. Öztürk, 2016) | MT              | the impact of informal<br>political networks on<br>the production<br>methods of squatter<br>settlements                                                    | abstract space                                  | 1979-2015           | Güzeltepe-Çayan<br>Neighborhood<br>(Istanbul)                              | X                                                       |
| (Pasin, 2009)     | BC              | Turkish hammam as a<br>representational space<br>of femininity                                                                                             | representational<br>space;<br>spatial practices | X                   | X                                                                          | Turkish hammam                                          |
| (Pasin, 2013)     | P               | Turkish hammam as a<br>representational space<br>of femininity                                                                                             | representational<br>space;<br>spatial practices | X                   | X                                                                          | Turkish hammam                                          |
| (Pasin, 2014)     | DT              | a critical analysis of<br>Ottoman-Turkish<br>hammam as a queered<br>space                                                                                  | abstract space;<br>spatial triad                | post-1970<br>period | Izmir, Istanbul,<br>Ankara                                                 | Ottoman-Turkish<br>hammam                               |
| (Pasin, 2016)     | P               | a critical reading of<br>the Ottoman-Turkish<br>hammam as a<br>representational space<br>of sexuality                                                      | spatial triad                                   | X                   | X                                                                          | Turkish hammam                                          |
| (Pekasil, 2016)   | P               | the theological/ritual-<br>cultural framework of<br>memory, memory<br>participation tools and<br>recall figures in the<br>Mardin Syriac<br>Orthodox Church | spatial practices                               | X                   | X                                                                          | Mardin Syriacs;<br>the Mardin Syriac<br>Orthodox Church |



| I <sup>1</sup>      | II <sup>2</sup> | III <sup>3</sup>                                                                                                                              | IV <sup>4</sup> | V <sup>5</sup>       | VI <sup>6</sup>                   | VII <sup>7</sup>                                                  |
|---------------------|-----------------|-----------------------------------------------------------------------------------------------------------------------------------------------|-----------------|----------------------|-----------------------------------|-------------------------------------------------------------------|
| (Penpecioglu, 2011) | P               | large-scale urban projects, production of space and neo-liberal hegemony in Turkey                                                            | abstract space  | the 2000s            | X                                 | X                                                                 |
| (Penpecioglu, 2012) | DT              | the political construction of urban development projects within the context of the relationships between the production of space and hegemony | abstract space  | the 2000s            | Izmir                             | New City Center and Inciralti Tourism Center Development Projects |
| (Penpecioglu, 2013) | P               | the relationship between the production of space and neo-liberal hegemony in the contexts of large-scale urban projects                       | abstract space  | the 2000s            | Izmir                             | X                                                                 |
| (Şahin, 2008)       | MT              | the impacts of post-1980 policies on public buildings (“unoccupied” buildings in Ankara)                                                      | spatial triad   | the post-1980 period | Ulus (Ankara)                     | the buildings of Emlakbank, Sümerbank and TEKEL in Ankara         |
| (Sakal, 2015)       | MT              | everyday tactics in the urban space of Istanbul                                                                                               | spatial triad   | X                    | X                                 | X                                                                 |
| (Salah, 2013)       | DT              | the transformation of the rural into suburban space and the formation of the suburban landscape                                               | spatial triad   | 1870-1940            | the suburbs of Kadıkoy (Istanbul) | X                                                                 |

| I <sup>1</sup>     | II <sup>2</sup> | III <sup>3</sup>                                                                                                           | IV <sup>4</sup>                    | V <sup>5</sup> | VI <sup>6</sup>    | VII <sup>7</sup>                                                                                                    |
|--------------------|-----------------|----------------------------------------------------------------------------------------------------------------------------|------------------------------------|----------------|--------------------|---------------------------------------------------------------------------------------------------------------------|
| (Salman, 2015)     | BC              | space and time in poetry                                                                                                   | spatial triad                      | X              | X                  | the poetry of Didem Madak                                                                                           |
| (Sandıkcı, 2015)   | P               | the imaginary and lived experiences of space in Beyoglu within the context of everyday practices and identity politics     | spatial triad                      | X              | Beyoglu (Istanbul) | X                                                                                                                   |
| (Sarı, 2010)       | MT              | the relationships of the social life and space in the Turkish cinema and the reflection of social life to the use of space | representational space             | 1960–1985      | X                  | 25 Turkish movies                                                                                                   |
| (Sarıtış, 2007)    | MT              | the potential of video in the transformation of urban space                                                                | abstract space; differential space | X              | X                  | the videos of “Karahaber” studio                                                                                    |
| (Sarıyıldız, 2007) | MT              | the appropriation of space by graffiti writes in Istanbul and graffiti practices as a form of resistance                   | spatial triad                      | X              | Istanbul           | graffiti                                                                                                            |
| (Selen, 2010)      | DT              | the contemporary Turkish performance in the context of the theory of sacrifice                                             | spatial triad                      | X              | X                  | religious rituals, queer activities, visual and performance artworks, mainstream and alternative stage performances |
| (Selen, 2012)      | M               | the stage as a space for queer                                                                                             | spatial triad                      | X              | X                  | the performances of Zeki Müren,                                                                                     |

| I <sup>1</sup>     | II <sup>2</sup> | III <sup>3</sup>                                                                                                                                                                   | IV <sup>4</sup>                                                   | V <sup>5</sup>                           | VI <sup>6</sup>                              | VII <sup>7</sup>                                |
|--------------------|-----------------|------------------------------------------------------------------------------------------------------------------------------------------------------------------------------------|-------------------------------------------------------------------|------------------------------------------|----------------------------------------------|-------------------------------------------------|
|                    |                 | subjectification in contemporary Turkey                                                                                                                                            |                                                                   |                                          |                                              | Bülent Ersoy and Seyfi Dursunoğlu               |
| (Selvi Ünlü, 2015) | BC              | the transformation of the public space within the framework of changing conceptions of space and planning approaches                                                               | spatial triad                                                     | From the mid-19th century to the present | Gümrük Square and Cumhuriyet Square (Mersin) | X                                               |
| (Şen, 2008)        | DT              | modernization, the production of the space, informal practices and the construction of urbanity in the Early Republican period                                                     | abstract space; spatial triad                                     | the 1930s                                | Ankara                                       | X                                               |
| (Senel, 2008)      | DT              | the production of urban space in Istanbul in the 20 <sup>th</sup> and 21st centuries through topographic practices, cartographic, literary and cinematic representations of places | spatial triad                                                     | 20th and 21st centuries                  | Istanbul                                     | maps, travel guides, documentaries              |
| (Şengül, 2015)     | P               | urban space and urban social movements                                                                                                                                             | spatial practice; representation of space; representational space | X                                        | X                                            | Gezi Protests                                   |
| (Şentürk, 2014)    | BC              | the contradictory spaces of labor: the social and spatial                                                                                                                          | contradictory space                                               | X                                        | Istanbul                                     | the hotel sector (chambermaids), the automobile |

| I <sup>1</sup>     | II <sup>2</sup> | III <sup>3</sup>                                                                                                                              | IV <sup>4</sup>                       | V <sup>5</sup> | VI <sup>6</sup> | VII <sup>7</sup>                                         |
|--------------------|-----------------|-----------------------------------------------------------------------------------------------------------------------------------------------|---------------------------------------|----------------|-----------------|----------------------------------------------------------|
|                    |                 | practices of work life<br>in Istanbul                                                                                                         |                                       |                |                 | sector<br>(mechanics),<br>shopping centers<br>(managers) |
| (Serin, 2016)      | P               | branded housing<br>projects and the<br>production of space in<br>Turkey                                                                       | spatial triad                         | 2003-2014      | X               | 6 branded housing<br>projects                            |
| (Şişmanoğlu, 2003) | MT              | the changing<br>meanings of house<br>and house space in the<br>poems of Behçet<br>Necatigil                                                   | representational<br>space             | X              | X               | the poems of<br>Behçet Necatigil                         |
| (Taş & Taş, 2015)  | P               | the street art in<br>Ankara in the context<br>of protest, resistance<br>and the right to the<br>city                                          | detournement;<br>counter-space        | 2000-2010      | Ankara          | X                                                        |
| (Tataroğlu, 2006)  | DT              | conceptual analysis of<br>tourism as a space-<br>based phenomenon                                                                             | abstract space;<br>differential space | X              | Marmaris        | X                                                        |
| (Tirben, 2007)     | MT              | white collar industrial<br>employees' alienation<br>to urban life in<br>Kocaeli (the lives<br>spaces of white-collar<br>industrial employees) | spatial triad                         | X              | Kocaeli         | X                                                        |
| (Tunç, 2003)       | MT              | the socio-spatial<br>impacts of shopping<br>centers on a city                                                                                 | abstract space                        | X              | X               | Migros Akköprü<br>Shopping Center<br>(Ankara)            |
| (Turan, 2011)      | MT              | taverns in Turkey in<br>the context of the                                                                                                    | spatial triad                         | X              | X               | taverns                                                  |

| I <sup>1</sup>                      | II <sup>2</sup> | III <sup>3</sup>                                                                                         | IV <sup>4</sup>          | V <sup>5</sup>                                         | VI <sup>6</sup>                                                    | VII <sup>7</sup> |
|-------------------------------------|-----------------|----------------------------------------------------------------------------------------------------------|--------------------------|--------------------------------------------------------|--------------------------------------------------------------------|------------------|
|                                     |                 | relationships of space and music                                                                         |                          |                                                        |                                                                    |                  |
| (Tureli, 2008)                      | DT              | the interconnectivity of urban representations, the production of subjectivity, and the built form       | spatial triad            | 2nd half of the 20 <sup>th</sup> century               | Istanbul                                                           | X                |
| (Turhanoglu, 2010)                  | P               | the production of urban space in Ankara in the Early Republican period                                   | spatial triad            | 1923-1950                                              | Ankara (with a special focus on the squares and Ataturk Boulevard) | X                |
| (Turkan, 2012)                      | P               | popular culture, shopping centers and the consumption of space                                           | the consumption of space | X                                                      | Olivium, Capitol and Kanyon Shopping Centers (Istanbul)            | X                |
| (Z. S. Uludağ, 1998)                | DT              | the social construction of meaning in landscape architecture                                             | representational space   | post-1940 period                                       | Gençlik Parkı (Ankara)                                             | X                |
| (Z. Uludağ, Çağlar, & Ulutav, 2005) | P               | a critical analysis of the conservation of urban environment                                             | spatial triad            | 1923-1940                                              | Marmara Havuzu and Karadeniz Havuzu (Ataturk Forest Farm, Ankara)  | X                |
| (Uluengin, 2010)                    | P               | modernization and the development of clock towers in the 19th century and in the Early Republican period | representational space   | 19th century, the 1st half of 20 <sup>th</sup> century | X                                                                  | clock towers     |

| I <sup>1</sup>     | II <sup>2</sup> | III <sup>3</sup>                                                                                                                                                | IV <sup>4</sup>                             | V <sup>5</sup> | VI <sup>6</sup>     | VII <sup>7</sup>                                         |
|--------------------|-----------------|-----------------------------------------------------------------------------------------------------------------------------------------------------------------|---------------------------------------------|----------------|---------------------|----------------------------------------------------------|
| (Ustundag, 2005)   | DT              | the constitution of the subjectivities and identities of rural-to-urban migrant women, the re-making of urban space, belonging to space and suffering in Turkey | representational space                      | X              | Esenyurt (Istanbul) | X                                                        |
| (Uzunali, 2015)    | MT              | the spaces, characters and the relation between the characters and spaces in Zeki Demirkubuz filmography                                                        | abstract space                              | X              | X                   | 9 movies of Zeki Demirkubuz filmography                  |
| (Varlı-Görk, 2010) | DT              | the reconstruction of Antalya in the framework of the making of a ‘city of culture’                                                                             | abstract space;<br>the consumption of space | the 2000s      | Antalya             | X                                                        |
| (Varlı-Görk, 2014) | BC              | the strategies of restructuring Antalya into a ‘city of culture’                                                                                                | the consumption of space                    | 2004-2009      | Antalya             | X                                                        |
| (Wilson, 2007)     | DT              | the funerary architecture of Mustafa Kemal Atatürk in the context of the construction and maintenance of national memory                                        | representation of space                     | X              | X                   | the funerary architecture of Mustafa Kemal Atatürk       |
| (Yardımcı, 2008)   | MT              | the new publicity and spatiality emerging in the process of neo-liberalization                                                                                  | spatial triad                               | the 2000s      | Hacıbayram (Ankara) | Special Project Area: Hacıbayram Mosque and Its Environs |

| I <sup>1</sup>            | II <sup>2</sup> | III <sup>3</sup>                                                                                          | IV <sup>4</sup>                                                         | V <sup>5</sup>          | VI <sup>6</sup>           | VII <sup>7</sup>                                      |
|---------------------------|-----------------|-----------------------------------------------------------------------------------------------------------|-------------------------------------------------------------------------|-------------------------|---------------------------|-------------------------------------------------------|
| (Yazıcı Yakın, 2015)      | P               | the traditional Ankara dance music and nightclubs                                                         | representational space;<br>spatial practice;<br>representation of space | X                       | Ankara                    | nightclubs (pavyon)                                   |
| (Yelsalı Parmaksız, 2014) | P               | changes in the experience of space and time during the process of urban transformation                    | abstract space                                                          | X                       | Levent-Göltepe (Istanbul) | X                                                     |
| (Yeşil, 2016)             | P               | psychogeographical analysis of the experience of urban space                                              | abstract space                                                          | X                       | X                         | <i>Istanbul: Memories and the City</i> by Orhan Pamuk |
| (Yıldız, 2016)            | P               | the perception of borders by passing migrants and asylum seekers in Turkey                                | representational space                                                  | X                       | X                         | migrants and asylum seekers                           |
| (Yılmaz, 2015)            | MT              | evaluation of Gezi Movement in the context of place/space, discursive practices and the right to the city | spatial triad                                                           | X                       | X                         | Gezi Movement                                         |
| (Yüksekli, 2013)          | P               | the effects of discourse on the production of urban built environment                                     | spatial triad                                                           | 1934-1942;<br>2005-2007 | Ataturk Park (Balıkesir)  | X                                                     |
| (Yüksekli & Akalin, 2011) | P               | the effects of discourse in the production of designed landscapes                                         | lived space;<br>conceived space;<br>spatial practice                    | 1930-1950               | Ataturk Park (Balıkesir)  | X                                                     |

| I <sup>1</sup> | II <sup>2</sup> | III <sup>3</sup>                                                                                           | IV <sup>4</sup> | V <sup>5</sup> | VI <sup>6</sup> | VII <sup>7</sup> |
|----------------|-----------------|------------------------------------------------------------------------------------------------------------|-----------------|----------------|-----------------|------------------|
|                |                 | within the urban<br>environment and the<br>role of discourse in<br>the spatial practices of<br>individuals |                 |                |                 |                  |
